# Supplementary material
Source: PubMed Central journal article supplement (PMC1472528)

# FISH with lung sample 0119

DAPI  
Zymed EGFr

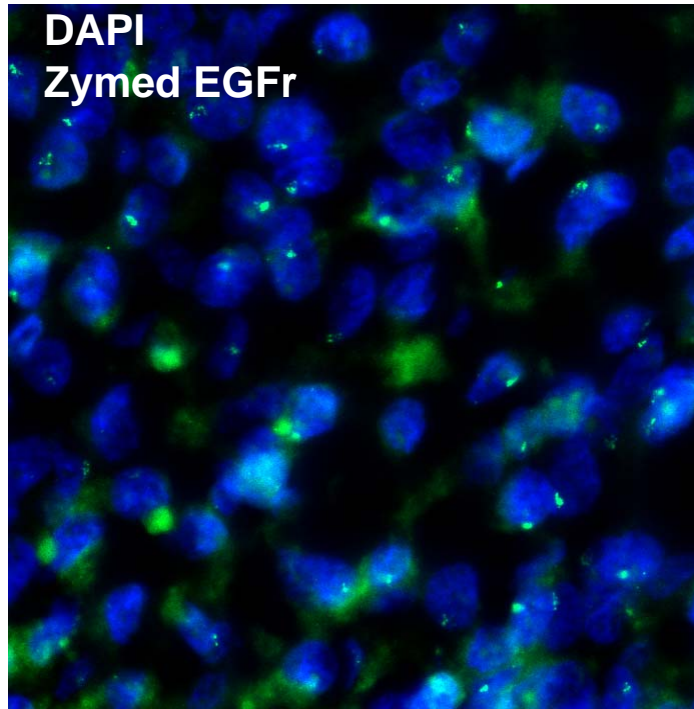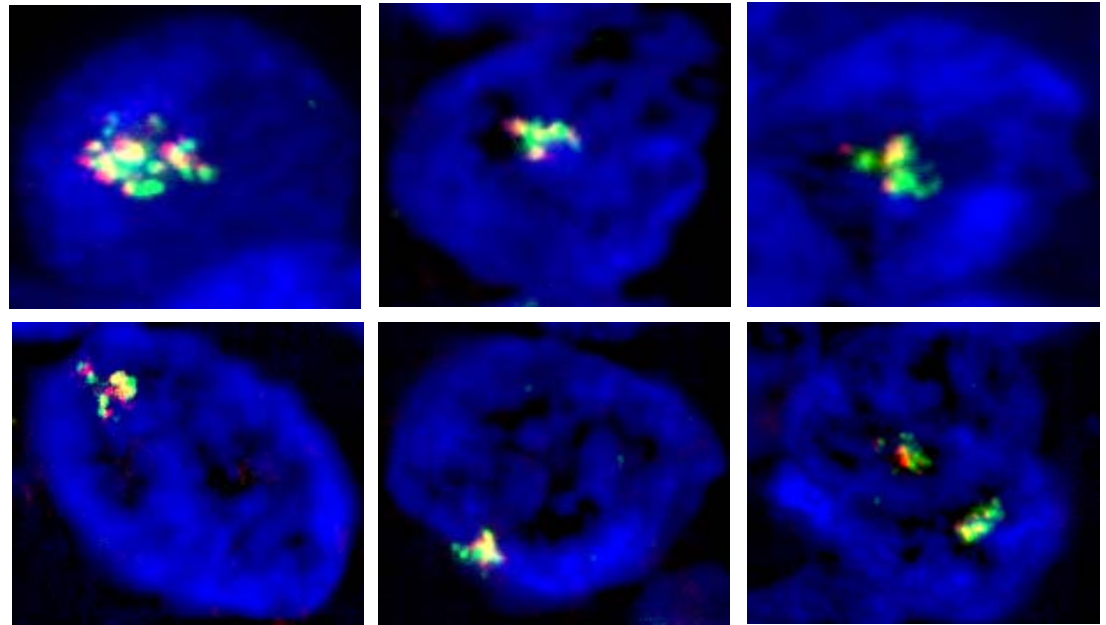

RGB

green

red

Zymed EGFr probe – green  
EGFr ex2-7 PCR-probe - red

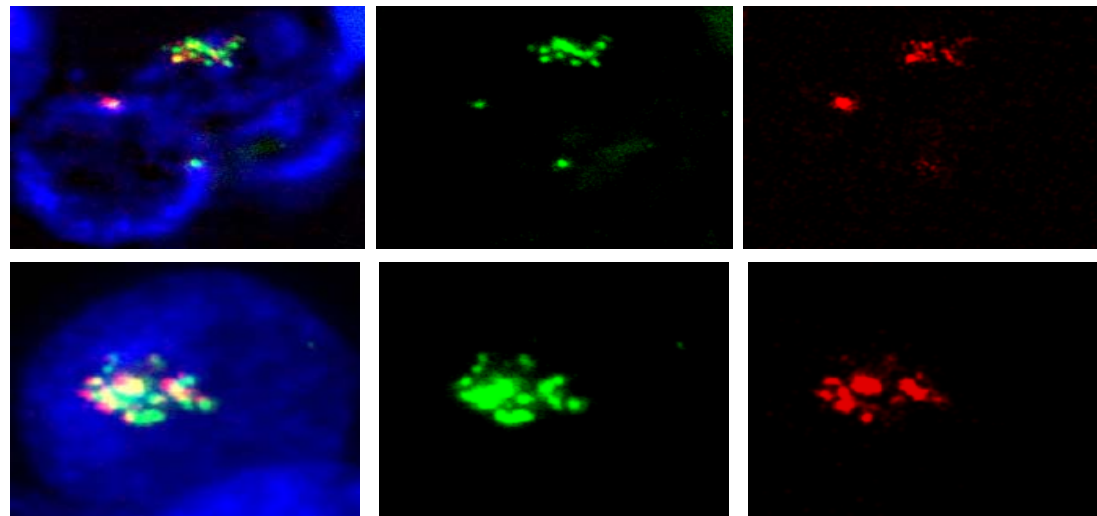

# FISH with lung sample 97-19

Zymed EGFr probe – green  
EGFr ex2-7 PCR-probe - red

RGB

green

red

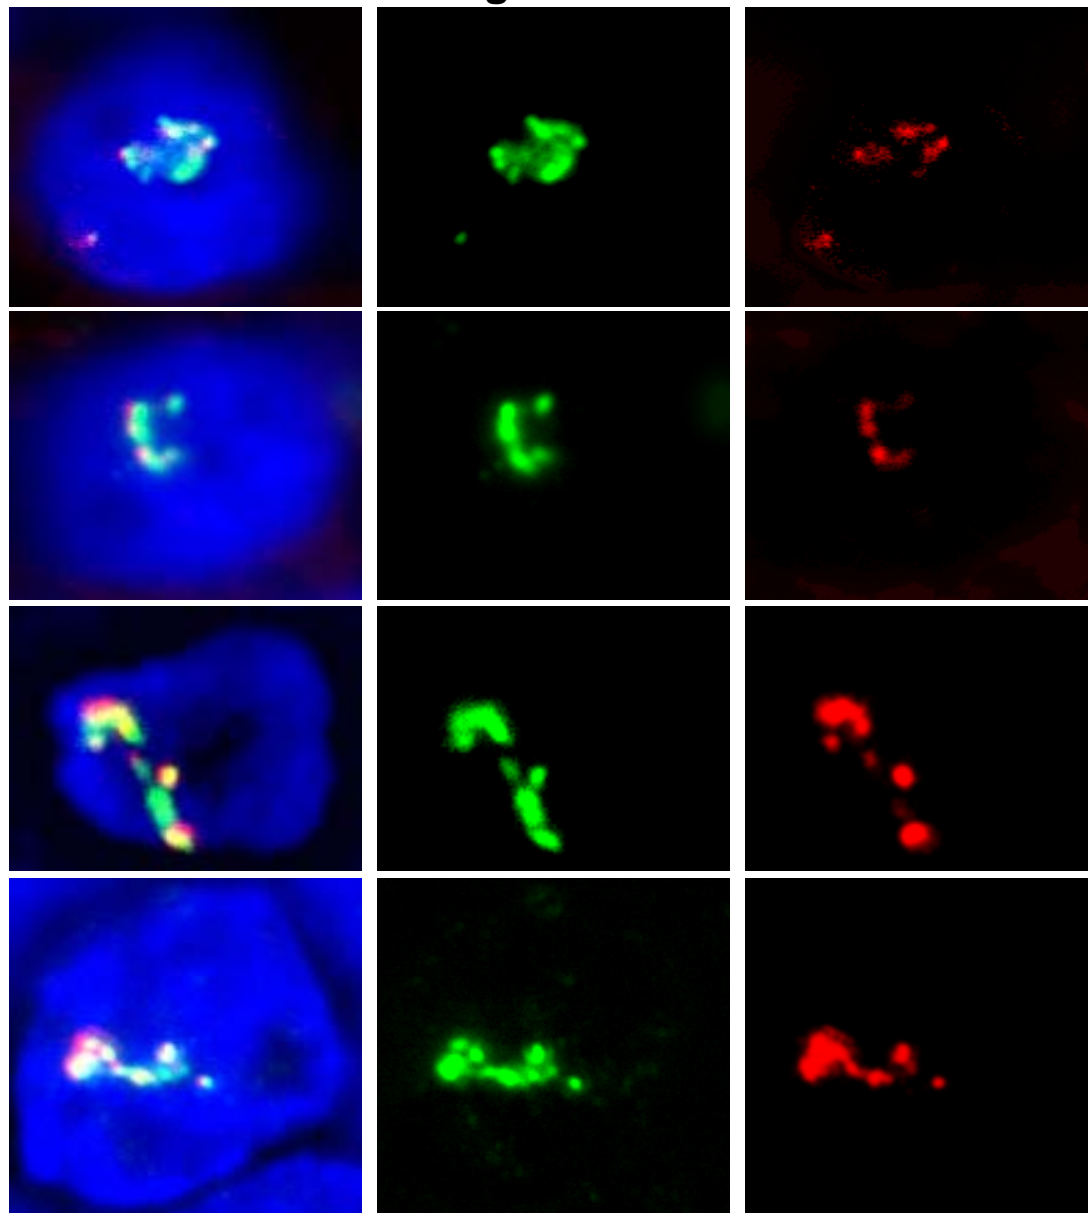

DAPI  
Zymed EGFr

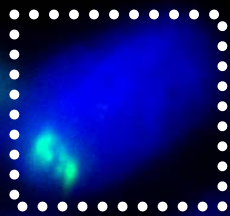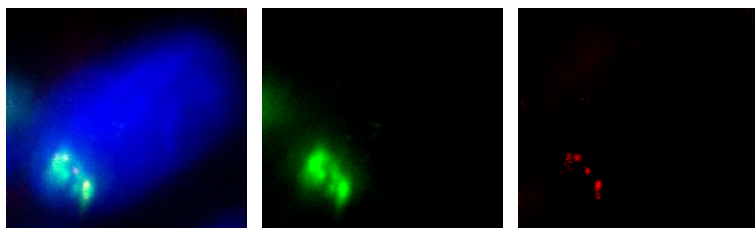

Supplement: pnas_0510284103_1.pdf [file pnas_0510284103_1.pdf]
