# Supplementary material
Source: PubMed Central journal article supplement (PMC1472528)

**Dox:**

**—**

**+**

**EGFRvIII**

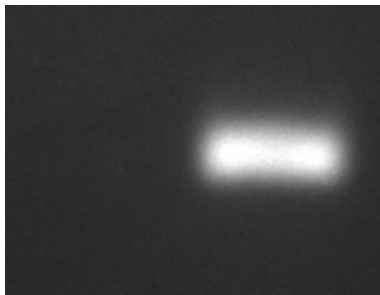

**$\beta$ -Actin**

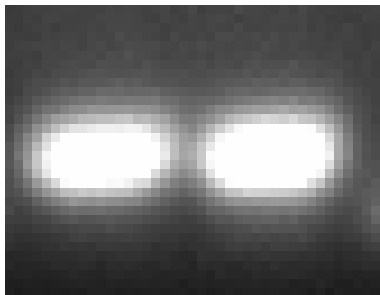

Supplement: pnas_0510284103_2.pdf [file pnas_0510284103_2.pdf]

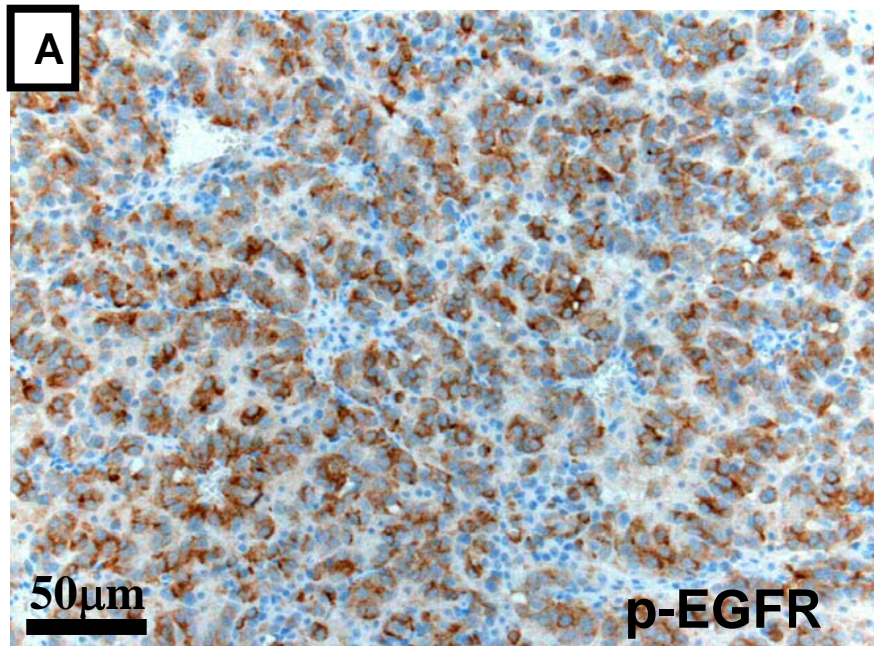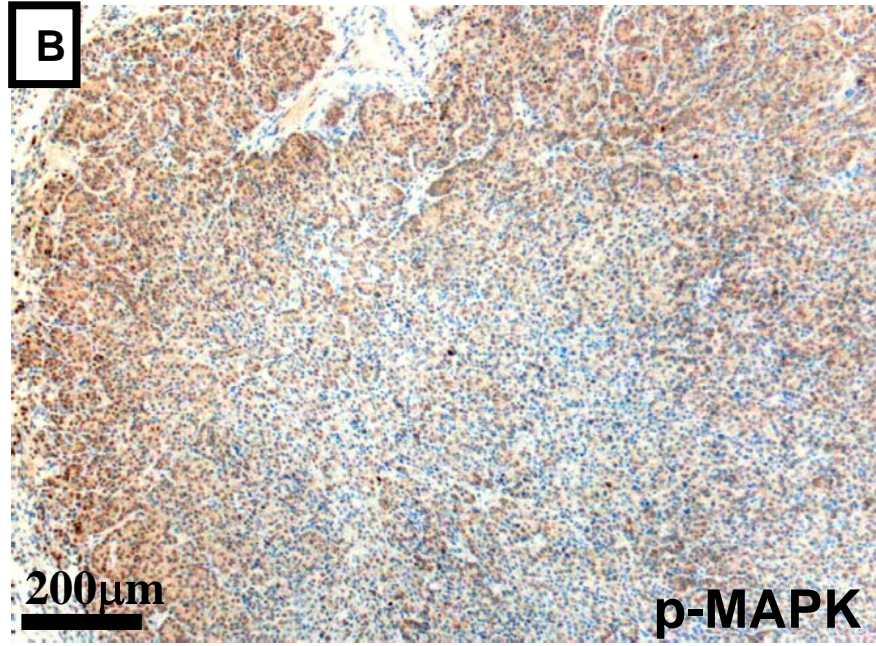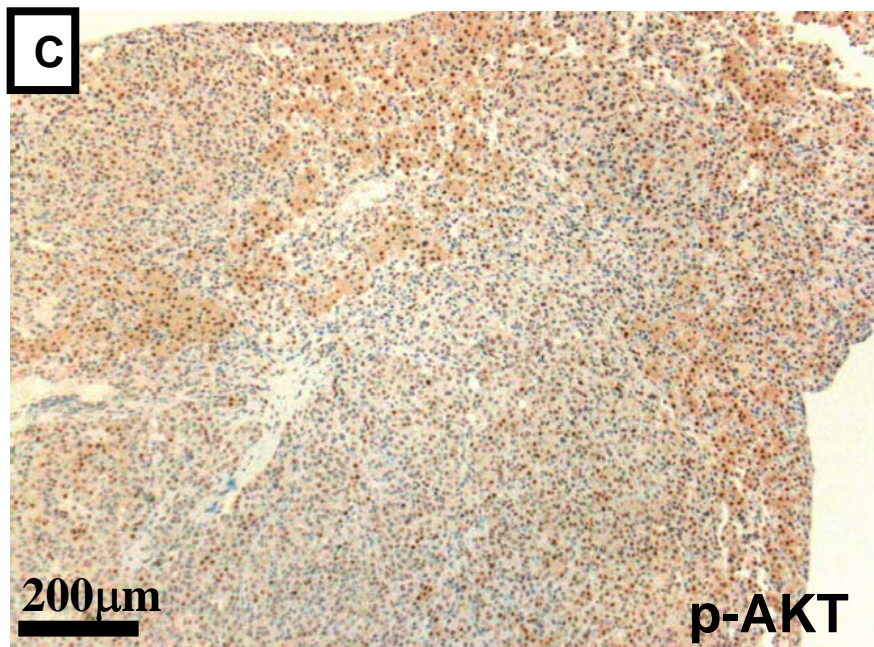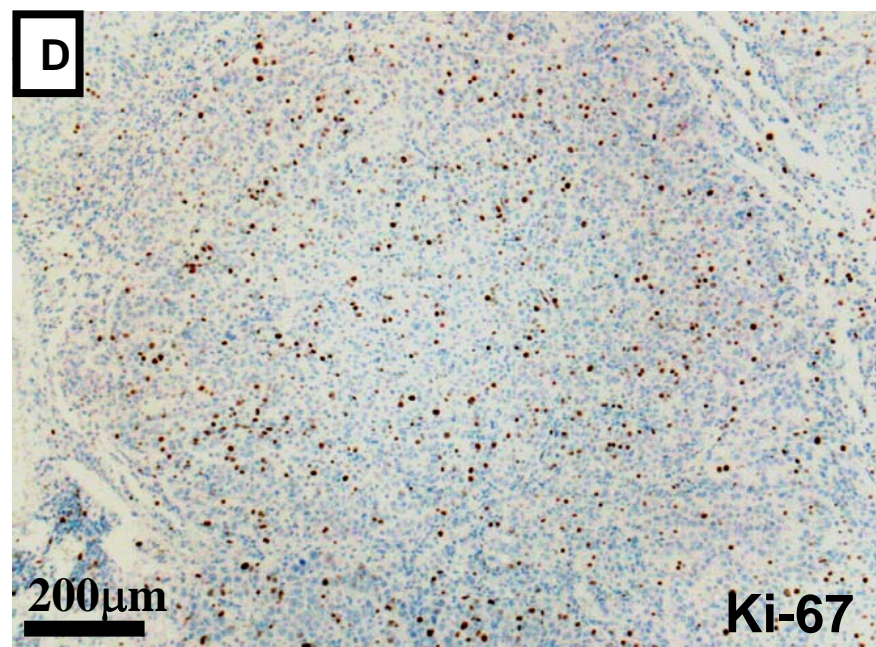

Supplement: pnas_0510284103_3.pdf [file pnas_0510284103_3.pdf]

**Dox  
(wk):**

**+16**

**+16/ -1**

**+16/ -3**

**+16/ -6**

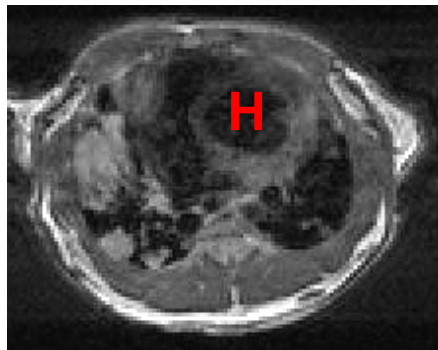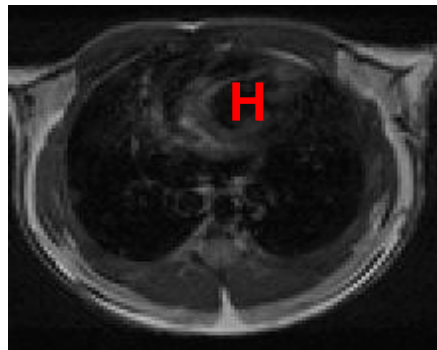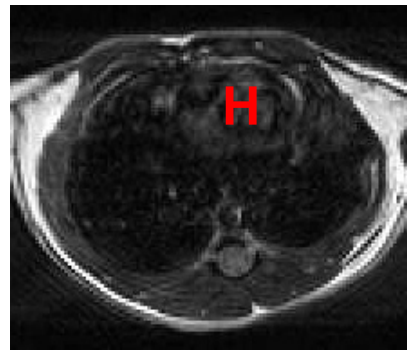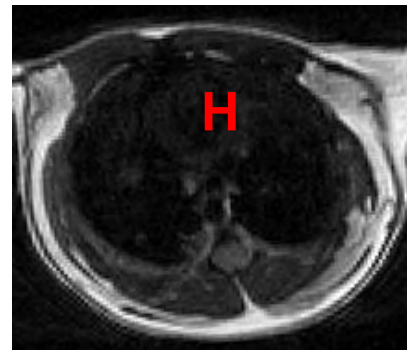

**+: on doxycycline**

**-: off doxycycline**

Supplement: pnas_0510284103_4.pdf [file pnas_0510284103_4.pdf]

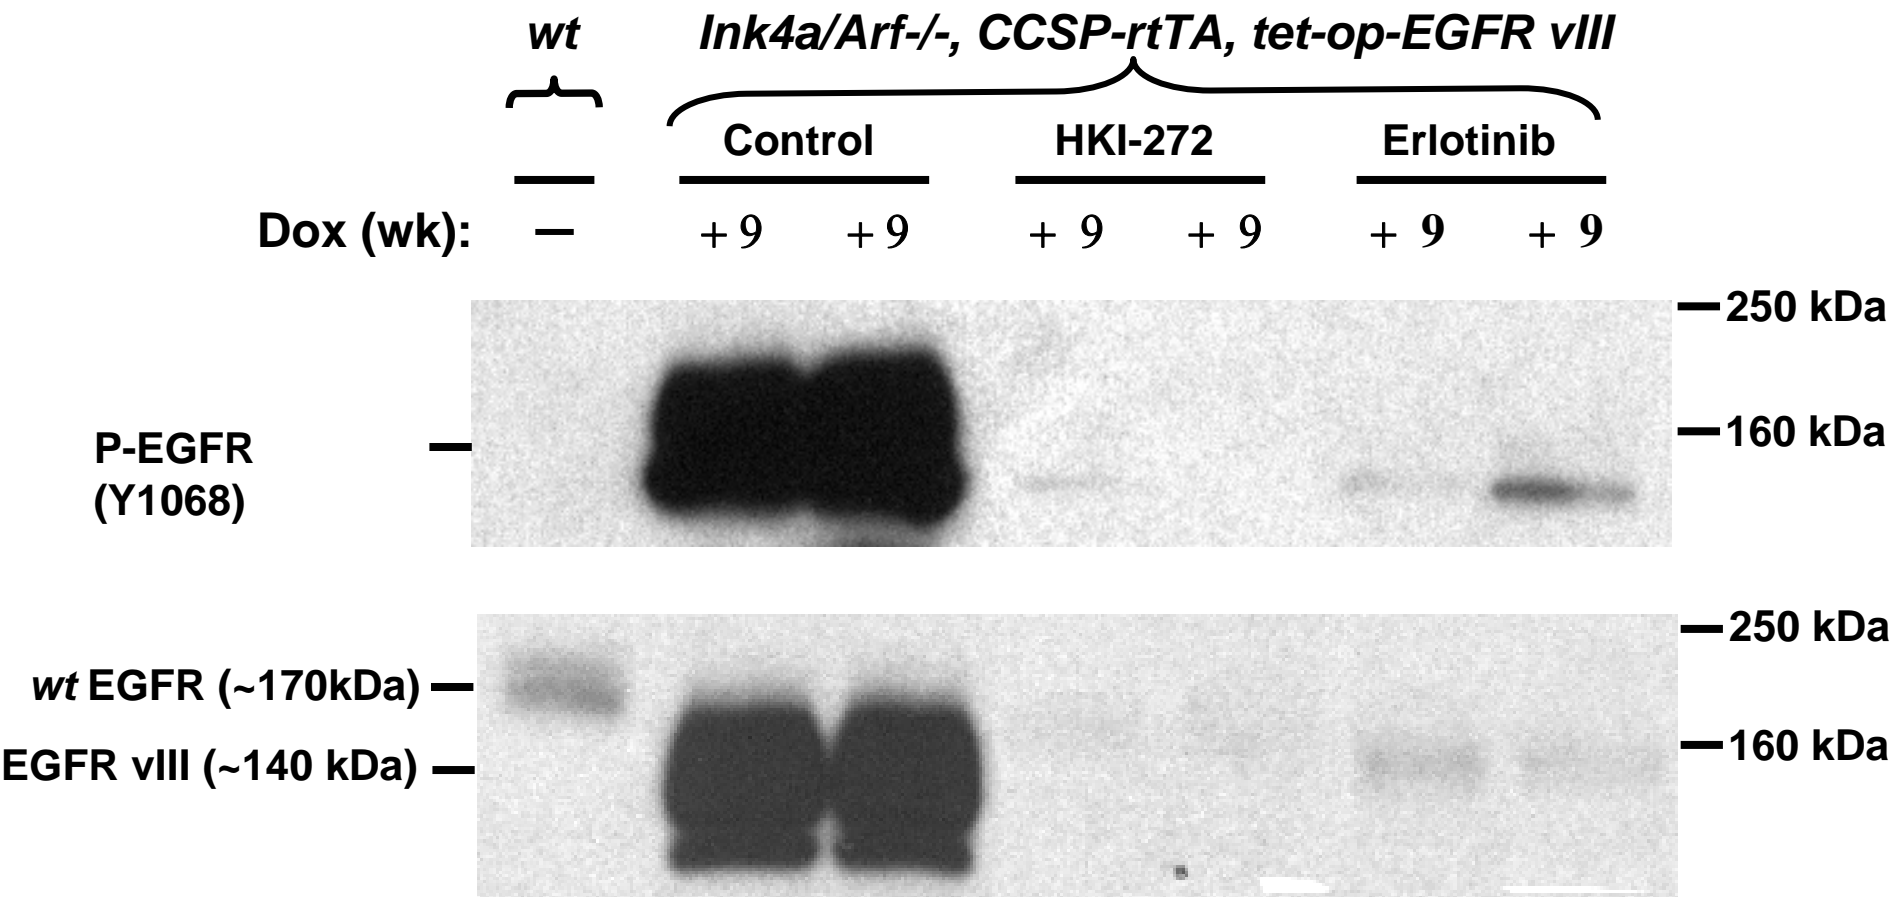

**+**: on doxycycline  
**-**: off doxycycline

Supplement: pnas_0510284103_5.pdf [file pnas_0510284103_5.pdf]

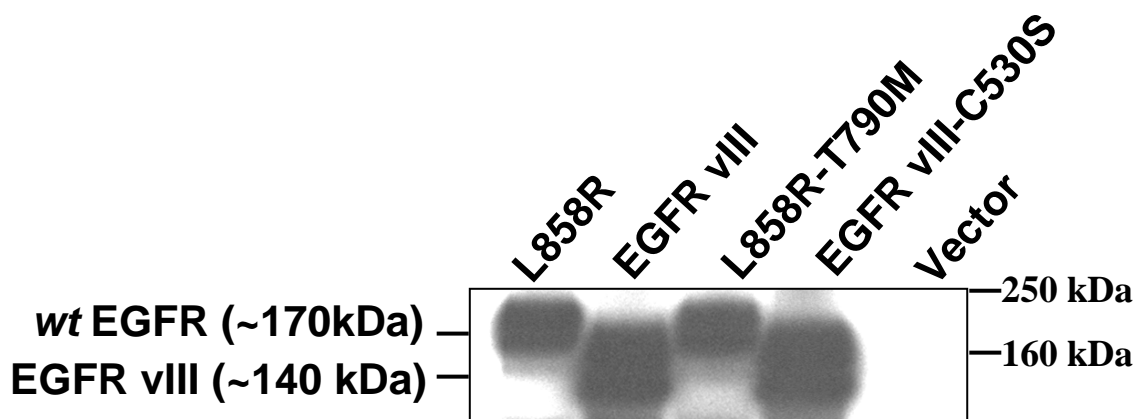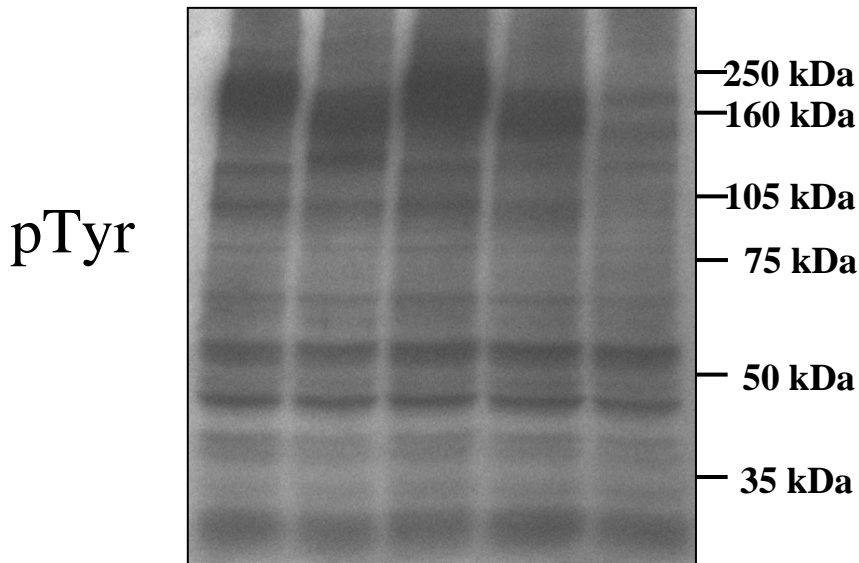

Menin

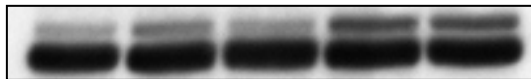

Supplement: pnas_0510284103_6.pdf [file pnas_0510284103_6.pdf]

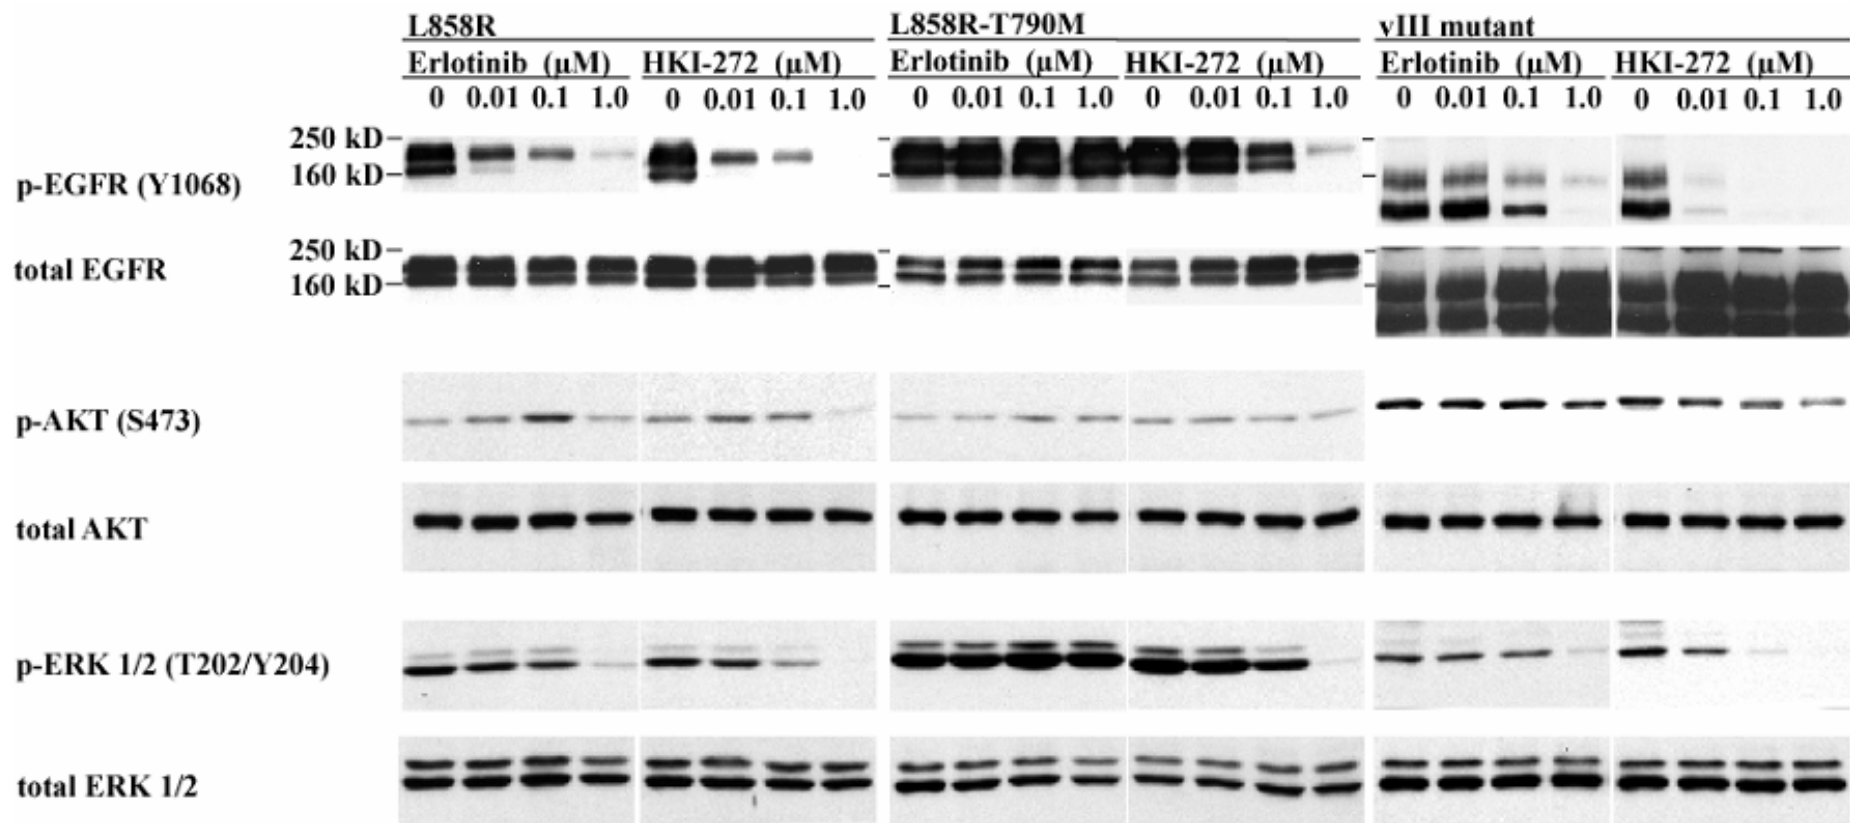

Supplement: pnas_0510284103_7.pdf [file pnas_0510284103_7.pdf]
